# Supplementary material
Source: publisher figshare collection journal article supplement (https://karger.figshare.com/ndownloader/files/23576552)
Supplement: Supplementary file 1 [file 23576552]

**SUPPLEMENTAL DATA**

**Figure S1.** **The densitometric analysis of β-catenin protein in lung after intraperitoneal administration of mimic-*miR-3162-3p*, DXM or antagomir.** The total or active β-catenin protein was detected by western blot. The gray value of each target protein/ [internal](javascript:;) [reference](javascript:;) β-actin was obtaind by Image J. Each group was corrected by the NC group to [calculate](javascript:;) its relative quantity. The relative quantitative densitometric values from three independent repeat experiments were plotted as histogram. The average relative quantitative densitometric value of each protein was added on the top of the protein band in Figure 1D or Figure 4E. **(A)** The relative quantitative densitometric value of Figure 1D. (B and C) The relative quantitative densitometric value of Figure 4E. * *P* < 0.05. The relative abundance of target protein under each group was expressed relative to β-actin (means ± SD, n = 3)

**(A)**


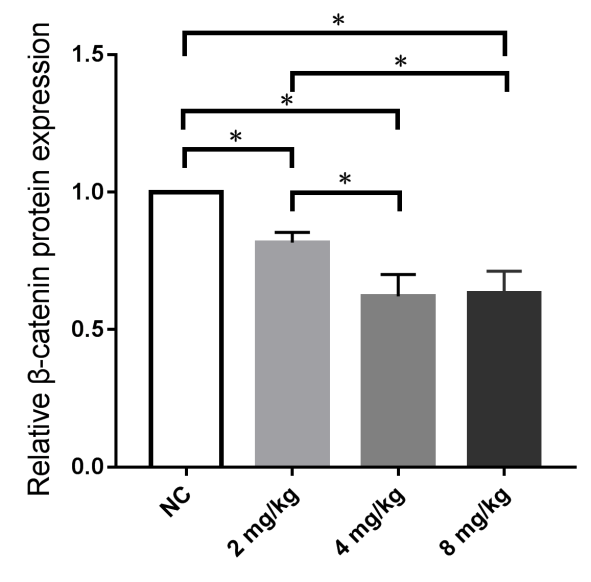


**(B) (C)**

**
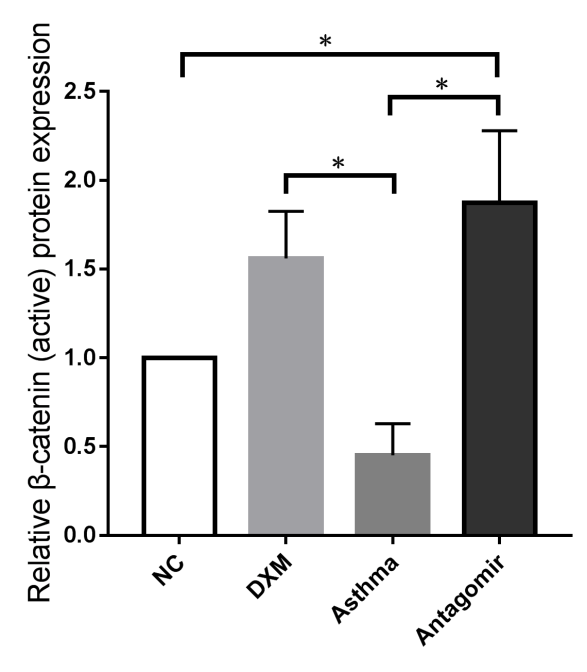

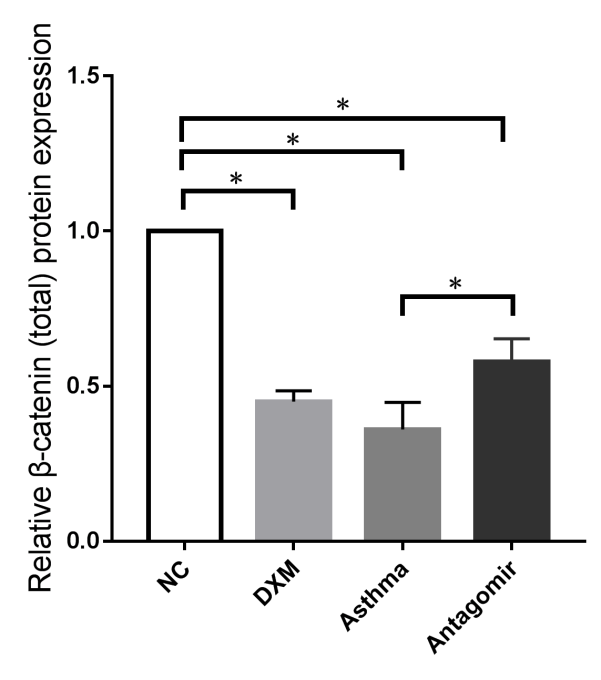
**

**Figure S2.** Levels of cytokines in lung homogenates upon anti-*miR-3162-3p* or DXM administration. (A) IL-17A. (B) IL-23p19. N = 6–8.

**
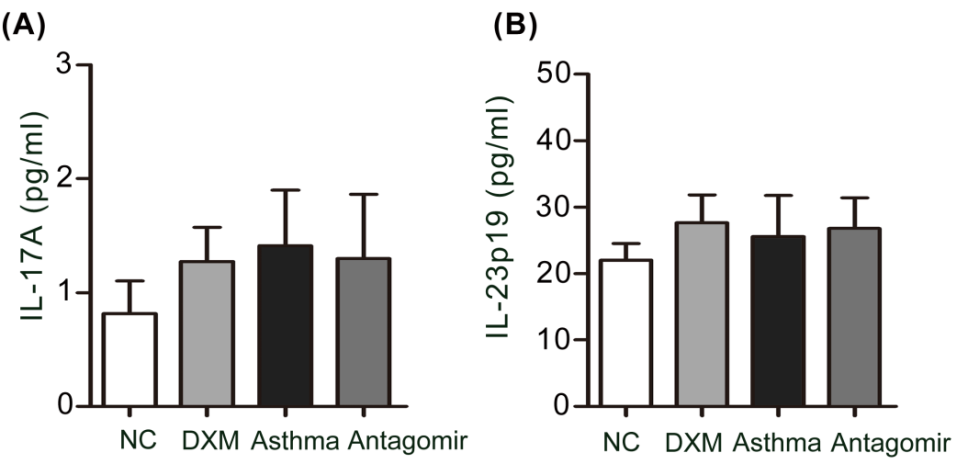
**
